# Supplementary material
Source: Research Square preprint supplement (doi:10.21203/rs.3.rs-9563368/v1)
Supplement: Supplementary file 1 [file 20162435de13c4d6d9a1f202.docx]

# Appendix A

Detailed Search Strategy Including Full Electronic Search Strategy for PubMed, EMBASE, Web of Science, and the Cochrane Library.

**Appendix A1.PubMed Search Strategies**

(probiotics[MeSH] OR probiotic*[tiab] OR Lactobacillus[Mesh] OR Lactobacillus[tiab] OR Saccharomyces[tiab] OR Bifidobacterium[Mesh] OR Bifidobacterium[tiab] OR Streptococcus[tiab] OR Enterococcus[tiab] OR Escherichia[tiab] OR Bacillus[tiab] OR fermented foods[MeSH] OR fermented food[tiab] OR fermented beverages[MeSH] OR fermented beverages[tiab] OR yogurt[MeSH] OR yogurt[tiab])

AND

(folic acid[MeSH] OR folic acid[tiab] OR vitamin B9[tiab] OR folate[tiab] OR vitamin B12[Mesh] OR vitamin B12[tiab] OR homocysteine[MeSH] or homocysteine[tiab])

AND

(randomized controlled trials as topic [Mesh] OR controlled clinical trial [Publication Type] OR random*[tiab] OR clinical [tiab] OR trial [tiab])

**Appendix A2.EMBASE Search Strategies**

(probiotic*: ab,ti OR Lactobacillus:ab,ti OR Saccharomyces:ab,ti OR Bifidobacterium:ab,ti OR Streptococcus:ab,ti OR Enterococcus:ab,ti OR Escherichia:ab,ti OR Bacillus:ab,ti OR “fermented food *”:ab,ti OR “fermented beverages *”:ab,ti OR yogurt:ab,ti )

AND

(folic acid:ab,ti OR vitamin B9:ab,ti OR folate vitamin B12:ab,ti OR homocysteine:ab,ti)

AND

(clinical Trial:ab,ti OR randomized Controlled Trial:ab,ti)

**Appendix A3.Web of Science Search Strategies**

Query TS=(probiotic OR Lactobacillus OR Lactobacillus OR Saccharomyces OR Bifidobacterium OR Bifidobacterium OR Streptococcus OR Enterococcus OR Escherichia OR Bacillus OR fermented foods OR fermented food OR fermented beverages OR fermented beverages OR yogurt OR yogurt) AND TS=(homocysteine OR folic acid OR vitamin B9 OR folate OR vitamin B12) AND TS=(trial or Clinical Trial or randomized controlled trial)

Appendix A4.Cochrane library Search Strategies

Mesh desciptor: [Probiotics]explore all tree OR (probiotic):ti,ab,kw OR (Lactobacillus):ti,ab,kw OR (Saccharomyces):ti,ab,kw OR (Bifidobacterium):ti,ab,kw OR (Streptococcus):ti,ab,kw OR (Enterococcus):ti,ab,kw OR (Escherichia):ti,ab,kw OR (Bacillus):ti,ab,kw OR (fermented foods):ti,ab,kw OR (fermented beverages):ti,ab,kw OR (yogurt):ti,ab,kw And (folic acid):ti,ab,kw OR (vitamin B9):ti,ab,kw OR (folate):ti,ab,kw OR (vitamin B12):ti,ab,kw OR (homocysteine):ti,ab,kw
